# Supplementary material for: A Functional Indel Polymorphism Within MIR155HG Is Associated With Sudden Cardiac Death Risk in a Chinese Population
Source: Front Cardiovasc Med. 2021 May 31;8:671168. doi: 10.3389/fcvm.2021.671168 (PMC8200405; doi:10.3389/fcvm.2021.671168)
Supplement: Supplementary file 2 [file Table_2.XLSX]

## Sheet: CASE
ID	AGE	GENDER	GENOTYPE	BMI	EVENT	SYMPTOM (24h before death)	AUTOPSY FINDINGS
							Forensic Pathological Diagnosis	Heart Weight（g）	Ventricular Thickness（Left/Right）(cm)	Circumference of the Valve (tricuspid valve/ pulmonary valve/bicuspid valve/ aortic valve）(cm)
1	59	M	2	26.19	After conflict	No reported complaints	Coronary atherosclerosis: LAD (>75%) RCA (>75%) LCX (>50%) Acute myocardial infarction Cardiac rupture	410	1.3/0.4	10.2	7.1	8.5	6.7
2	35	M	2	23.68	Found deceased at passageway	No reported complaints	Coronary atherosclerosis: LAD (>75%) RCA (>75%) LCX (>75%）	340	1.3/0.4	12.5	8	10	7.5
3	67	M	1	25.19	After conflict	No reported complaints	Coronary atherosclerosis: LAD (>75%) RCA (>75%) LCX (>75%)	380	1.4/0.3	11.5	8.5	10	7.5
4	56	M	1	24.52	After conflict	No reported complaints	Coronary atherosclerosis: LAD (>75%) LCX (>75%) Pulmonary congestion	360	1/0.3	12.5	8.5	9.5	7
5	37	M	2	23.15	Acupuncture treatment	No reported complaints	Coronary atherosclerosis: LAD (>75%) Right coronary artery stenting	300	1.3/0.3	10.5	5	9.5	5.5
6	34	M	2	27.44	Found deceased at home	No reported complaints	Coronary atherosclerosis: LAD (>75%) RCA (>75%) LCX (>25%)	500	1.3/0.4	13	9	10	8.5
7	41	M	1	25.29	Remain in hospital for treat	Suffered Informal treatment	Coronary atherosclerosis: RCA (>50%) Interstitial myocarditis	380	1.2/0.3	11	6.5	9	7
8	37	M	1	19.91	Sleep	No reported complaints	Coronary atherosclerosis: LAD (>75%) RCA (>75%) Pulmonary congestion	300	1.5/0.3	10.5	7.5	9.5	7.5
9	47	M	1	23.87	Found deceased at home	No reported complaints	Coronary atherosclerosis	300	1.1/0.3	11.5	7.5	9.5	6.5
10	53	M	1	18.14	Found deceased at home	No reported complaints	Coronary atherosclerosis	290	1.2/0.4	10.5	7.8	9	7
11	45	M	3	20.55	Found deceased at home	No reported complaints	Coronary atherosclerosis and thromboembolism in LAD	300	1.2/0.2	11	7.5	8	7
12	53	M	1	17.32	Found deceased at home	No reported complaints	Coronary atherosclerosis	260	1.4/0.3	10	7	8.5	6
13	39	M	1	21.5	Found deceased at home	No reported complaints	Coronary atherosclerosis and intra-plaque hemorrhage Myocardial infarction	320	1.2/0.3	11.5	6.5	9.5	6
14	19	M	1	18.45	Found deceased at home	No reported complaints	Coronary atherosclerosis	280	1.1/0.3	11.5	8.5	9	7
15	74	M	1	23.81	Found deceased at home	No reported complaints	Coronary atherosclerosis	320	1.3/0.2	11.5	6.5	9.5	6
16	82	F	1	22.62	Found deceased at home	No reported complaints	Coronary atherosclerosis	300	1.3/0.4	12	8.5	10	8
17	24	M	1	23.31	Found deceased at home	No reported complaints	Coronary atherosclerosis and thromboembolism in LAD	320	1/0.3	10.5	7.6	9	6.5
18	29	M	1	19.62	Found deceased at home	No reported complaints	Coronary atherosclerosis	300	1.1/0.2	9.5	7	8.5	6
19	49	M	1	24.69	Found deceased at home	No reported complaints	Coronary atherosclerosis	360	1.1/0.3	10.5	8	9	7.5
20	43	M	1	23.92	Found deceased at home	No reported complaints	Coronary atherosclerosis	375	1.4/0.4	11.5	9.5	8.5	7
21	44	M	1	25.6	After conflict	No reported complaints	Coronary atherosclerosis: LAD (>75%) RCA (>75%) Old myocardial infarction	380	1.4/0.3	11	8.5	9	7.5
22	59	M	1	31.74	Treating a cold	No reported complaints	Coronary atherosclerosis: LAD (>75%) Fatty liver	500	1.5/0.4	11	9.5	10	8.5
23	71	M	2	24.31	After conflict	No reported complaints	Coronary atherosclerosis: LAD (>75%) old myocardial infarction Squamous cell lung carcinomas	350	1.2/0.3	11.5	8.5	10	7.5
24	69	F	1	22.33	Found deceased at home	No reported complaints	Coronary atherosclerosis：LAD (>75%) RCA (>75%) Spleen renal arteriolar sclerosis	300	1.1/0.3	12	7.2	9	6
25	49	M	1	25.39	After conflict	No reported complaints	Coronary atherosclerosis: LAD (>75%) RCA (>75%) Spleen renal arteriolar sclerosis	350	1/0.3	12.5	8.5	11.5	9
26	49	M	1	28.78	After conflict	No reported complaints	Coronary atherosclerosis：LCX (>75%) Pulmonary venous pleonaemia Fatty liver	470	1.4/0.3	12.5	9	11	8.5
27	79	F	3	21.41	Treating burns and scalds	No reported complaints	Coronary atherosclerosis: LAD (>75%) LCX (>25%) Hypertensive cardiovascular disease	320	1.3/0.3	11.5	7.4	9	7
28	53	M	1	29.86	Physical activity	No reported complaints	Coronary atherosclerosis: LAD (>50%) RCA (>50%) Fatty liver Multiple fracture of rib	400	1.2/0.3	14	8	9.5	7.5
29	46	M	1	26.15	Found deceased at Detention Center	No reported complaints	Coronary atherosclerosis: LAD (>75%) LCX (>75%) Hypertensive cardiovascular disease Old myocardial infarction	380	1.2/0.3	12.5	8.3	9.5	7
30	47	M	2	17.28	Physical activity	No reported complaints	Coronary atherosclerosis: LAD (>75%) Pulmonary venous pleonaemia	260	1.1/0.2	10.5	8	9	6
31	56	M	1	20.11	Found deceased at hotel	No reported complaints	Coronary atherosclerosis: LCX (>25%) RCA (>25%) Hypertensive cardiovascular disease	300	1.3/0.4	11	9.5	8.5	7.5
32	50	M	1	18.48	During intravenous drip infusion	Abdominal pain	Coronary atherosclerosis: LAD (>75%) LCX (>50%) Tuberculosis	310	1.4/0.3	11.5	9.5	8	7.5
33	48	M	1	27.59	Found deceased at home	Chest distress nausea	Coronary atherosclerosis: LAD (>75%) Spleen renal arteriolar sclerosis Fatty liver	400	1.4/0.4	11.5	9	9.3	7.5
34	32	M	1	32.57	Sleep	No reported complaints	Coronary atherosclerosis: LAD (>75%) RCA (>75%) Fatty liver	500	1.5/0.3	10.5	7.8	8	7.5
35	61	M	1	19.9	Remain in hospital under observation	No reported complaints	Coronary atherosclerosis: RCA (>75%) Hypertensive cardiovascular disease Spleen renal arteriolar sclerosis	300	1.2/0.3	11	7	9	6.5
36	56	M	1	23.15	Physical activity	Dyspnea	Coronary atherosclerosis: LAD (>75%) RCA (>75%) Abdominal Aortic Aneurysm Peritonitis	390	1.4/0.3	12	8.5	9	7.8
37	50	M	2	25.09	After conflict	No reported complaints	Coronary atherosclerosis: LAD (>75%) RCA (>75%) Pulmonary congestion	380	1.3/0.3	13	7	9.5	7
38	48	M	1	21.83	Remain in hospital under observation	No reported complaints	Coronary atherosclerosis: LAD (>50%) Hypertensive cardiovascular disease Acute myocardium infarction	350	1.2/0.3	12.5	9.5	10	7.5
39	50	M	1	24.26	Physical activity	No reported complaints	Coronary atherosclerosis: LMCA (75%) LCX (70%) RCA (75%)	380	2/0.4	11.5	8.5	10	7.2
40	41	M	1	23.24	Found deceased at home	No reported complaints	Coronary atherosclerosis: LAD (70%)	350	1.5/0.4	12.5	10	9.5	8
41	58	M	1	30.1	Found deceased at home	No reported complaints	Coronary atherosclerosis: LAD (>95%)	480	1.4/0.4	12	9.5	11	8
42	46	M	2	22.06	Having a sauna	No reported complaints	Coronary atherosclerosis: LMCA (>75%)	320	1.2/0.3	11.5	9.8	10	7.5
43	68	M	1	23.16	After cataract surgery	No reported complaints	Coronary atherosclerosis: LAD (75%) Acute myocardial infarction Left ventricle rupture	320	1.3/0.2	11.5	9	9.5	7
44	62	M	2	24.56	Physical activity	Herpes zoster with fever	Coronary atherosclerosis: RCA (90%) LAD (40%) LCX (30%) Acute myocardial infarction Left ventricular rupture	350	1.5/0.4	12	9.5	10	7
45	47	M	1	22.85	Sleep	No reported complaints	Coronary atherosclerosis: LAD (55%)	300	1.2/0.3	10.5	8	9.5	7
46	37	M	2	20.83	Sleep	No reported complaints	Coronary atherosclerosis (>75%)	300	1.2/0.3	11	9	10	7
47	53	M	1	21.5	Physical activity	Suffering influenza	Coronary atherosclerosis: LAD and RCA (>75%) Acute myocardial infarction Left ventricle rupture	300	1.3/0.3	12	9.5	11	8.5
48	69	M	1	19.86	Physical activity	Stomachache with anhelation and dizzy	Coronary atherosclerosis: LAD (80%) RCA (90%)	300	1.4/0.4	11.5	9	10.5	9
49	41	M	1	24.43	Physical activity	No reported complaints	Coronary atherosclerosis: LAD (80%) RCA (30%)	320	1.3/0.3	11.5	7.8	9	7.5
50	31	M	1	23.36	During intravenous drip infusion of gentamycin	No reported complaints	Coronary atherosclerosis: LMCA (51%-75%), RCA (26%-50%)	320	1.2/0.3	11.5	8	9.5	8
51	32	M	1	20.83	Drinking alcohol	No reported complaints	Coronary atherosclerosis: LAD (90%)LCX (95%) Fibrinous pericarditis	300	1.2/0.3	11	7	9	6.5
52	39	M	1	21.1	Physical activity	No reported complaints	Coronary atherosclerosis: LAD (90%)	290	1.1/0.2	10	7.5	9	6.5
53	23	M	1	23.48	Sleep	Acute alcoholic intoxication	Coronary atherosclerosis: LAD (80%) RCA (60%) Myocardial hemorrhage	300	1.4/0.3	11	8.5	10	7
54	36	M	1	20.08	Sleep	No reported complaints	Coronary atherosclerosis: LAD (75%)	300	1.4/0.4	11.5	9	10	7.5
55	47	M	1	28.34	Physical activity	No reported complaints	Coronary atherosclerosis: LMCA (98%)	400	0.9/0.3	10.5	7	9	6.4
56	57	M	1	22.38	Sleep	No reported complaints	Coronary atherosclerosis: LAD (75%) LCX (60%), RCA (25%)	350	1.5/0.5	12.5	8.5	9.5	7.8
57	52	M	1	24.87	Found deceased at home	No reported complaints	Coronary atherosclerosis: LAD (65%) LCX (60%), RCA (90%)	370	1.4/0.5	11.5	8	10.5	8
58	61	M	2	23.15	Physical activity	Acute heart failure and pneumonedema complicated by intracoronary stenting	Coronary atherosclerosis: LAD (80%) LCX (80%) RCA (40%) Myocardial infarction	320	1/0.2	11	6	8	5
59	30	F	3	24.3	Physical activity	No reported complaints	Coronary atherosclerosis: LAD (95%) Mild myocarditis Uterine pregnancy	350	1.2/0.3	12	8	10	7.5
60	36	M	1	18.23	Sleep	No reported complaints	Coronary atherosclerosis: LCX (80%) RCA (30%)	250	1.1/0.2	11	6	9	6.5
61	40	M	2	23.91	Sleep	Suffering diarrhea	Coronary atherosclerosis: LAD (70%)	350	1.5/0.3	11.5	6.5	10	7
62	41	M	2	22.08	Physical activity	Hypokalemic periodic paralysis	Coronary atherosclerosis: LAD (80%) RCA (50%)	330	1.3/0.4	10.5	7	9.5	7
63	71	F	2	25.34	During intravenous drip infusion of dextran and anisodamine	Acute gastritis	Coronary atherosclerosis: LAD (90%) Old myocardial infarction	450	1.2/0.3	13	7.5	11	7.5
64	45	M	1	21.23	Physical activity	No reported complaints	Coronary atherosclerosis: LAD (85%) Acute myocardial infarction	280	1.2/0.2	12.5	7	10	7
65	45	M	1	25.06	Physical activity	No reported complaints	Coronary atherosclerosis: LMCA (90%) RCA (70%)	420	1.1/0.2	11	6	10.5	7
66	63	M	1	22.18	During quarrel	No reported complaints	Coronary atherosclerosis: LCX (80%) Old myocardial infarction cardiomegaly	320	1.2/0.3	12.5	7.5	9.5	7
67	36	M	2	23.87	Physical activity	Choking sensation before death	Coronary atherosclerosis: LAD (90%)	300	1.3/0.3	12	8	10	7.5
68	50	M	1	24.3	Physical activity	Stomachache before death	Coronary atherosclerosis: LAD (95%)	390	1.3/0.3	12	7.5	10	6.5
69	75	M	1	22.45	Physical activity	No reported complaints	Coronary atherosclerosis: LMCA (90%) Apical aneurysm Emphysema	300	1.2/0.2	11.5	7.5	11	8
70	66	M	2	22.32	Physical activity	Hypertension	Coronary atherosclerosis: LAD (80%) RCA (60%) Left ventricular hypertrophy	300	1.1/0.3	11	7	10.5	7.5
71	77	M	1	25.51	After conflict	Hypertension	Coronary atherosclerosis: LAD (90%) LCX (70%) RCA (40%)	409	1.3/0.3	12	8	10	7.5
72	53	M	1	20.95	Physical activity	No reported complaints	Coronary atherosclerosis: LAD (75%) LCX (50%)	260	0.8/0.2	11.5	7	8.5	5.5
73	51	M	1	20.53	Sleep	Palpitation after acupuncture	Coronary atherosclerosis: LAD (80%) LCX (50%) RCA (85%)	280	1.1/0.3	10	8.6	9.5	7
74	42	M	1	27.87	During intravenous drip infusion	Stomachache before death	Coronary atherosclerosis: LAD (85%) RCA (55%)	400	1.3/0.4	11	7.5	8	7
75	45	M	1	24.98	Physical activity	No reported complaints	Coronary atherosclerosis (90%) with intra-plaque hemorrhage	360	1.1/0.3	11	7	9	6.5
76	65	F	2	21.15	Physical activity	No reported complaints	Coronary atherosclerosis: LMCA (80%) LAD (70%)	295	1.2/0.3	11	7	8.5	5.5
77	49	M	1	26.97	Sleep	Backache before death	Coronary atherosclerosis: LAD (>75%) RCA (>75%) Brainstem hemorrhage	420	1.4/0.3	10.7	6.8	9.5	6.5
78	31	M	1	20.56	Physical activity	Having a fever	Coronary atherosclerosis: LAD (60%) Acute pneumonia Mild inflammation in the Aschoff's node	280	1.1/0.2	10.5	8	9.5	7
79	74	F	1	24.18	During intravenous drip infusion	Stomach discomfort and headache before death	Coronary atherosclerosis: LAD (80%)	377	0.8/0.3	10.7	7.4	8.5	7.5
80	36	M	1	25.52	Physical activity	Stomach discomfort before death	Coronary atherosclerosis: LAD with thrombogenesisRCA (70%) Cardiomegaly Myocardial infarction in the apex of heart	420	1.3/0.3	12	8	10	7
81	58	M	1	23.37	During surgery (Total hip replacement)	No reported complaints	Coronary atherosclerosis: LAD (70%) LCX (75%) RCA (60%)	320	1.2/0.2	11.5	7	8.5	6.5
82	56	M	2	26.28	After conflict	No reported complaints	Coronary atherosclerosis: LMCA (80%) RCA (70%)	400	1.5/0.3	13	8.5	11.5	8
83	45	M	1	19.96	During intravenous drip infusion	Feel nauseated	Coronary atherosclerosis: LAD (60%) RCA (70%)	240	1.2/0.2	10	6.5	8.5	6
84	60	M	3	24.27	During surgery (coronary stenting)	No reported complaints	Coronary atherosclerosis: LMCA (80%) RCA (95%) Myocardial infarction Adipose infiltration in the Aschoff's node	390	1.3/0.2	12	8	9.5	7
85	61	M	2	27.41	Physical activity	No reported complaints	Coronary atherosclerosis: LAD (90%) LCX (80%) RCA (70%) Old myocardial infarction	450	1.4/0.2	12	9	10	8
86	52	M	2	28.28	After conflict	No reported complaints	Coronary atherosclerosis: LAD (80%) LCX (60%) RCA (90%) Old myocardial infarction	400	1.3/0.4	11	9	10	8.5
87	56	M	2	23.76	After surgery (Percutaneous Coronary Intervention)	No reported complaints	Coronary atherosclerosis: LAD (70%) Old myocardial infarction Focal hemorrhage in the right ventricular myocardial	340	1.2/0.3	11	6.5	9.5	7
88	67	M	2	23.05	During intravenous drip infusion of ceftizoxime sodium	Head injury before death	Coronary atherosclerosis: LAD (90%) RCA (50%) Myocardial infarction	320	1.1/03	11	7.5	8.5	6.5
89	27	F	2	20.35	Found deceased at home	No reported complaints	Myocardial bridge on LAD RCA straitness Adipose infiltration in the atrionector Pulmonary infection	286	0.9/0.3	11	6	8.5	6
90	49	M	1	24.78	After surgery(cholecystectomy) During intravenous drip infusion	Severe convulsions in the chest abdomen	Coronary atherosclerosis: LAD (70%) with intra-plaque hemorrhage RCA (20%) Pulmonary congestion	350	1.3/0.4	11	8	7.5	7
91	75	M	1	25.9	After conflict	No reported complaints	Coronary atherosclerosis: LAD (75%) RCA (60%)	360	1.2/0.4	10.5	8.5	7	6.5
92	46	M	2	25.68	Sleep	No reported complaints	Coronary atherosclerosis: LAD (80%) RCA (60%) Pulmonary congestion	430	1.2/0.2	14	9.5	11	7.5
93	56	M	1	23.86	Physical activity	No reported complaints	Coronary atherosclerosis: LAD (80%) LCX（60%） RCA (70%)	310	1.1/0.3	12.5	9	9.5	7.5
94	46	M	1	23.08	Physical activity	No reported complaints	Coronary atherosclerosis: LAD (75%) LCX（50%） RCA (60%) Old myocardial infarction	300	1.2/0.3	11.5	7.5	8.5	6
95	71	M	1	28.24	Physical activity	No reported complaints	Coronary atherosclerosis: LAD (80%) LCX（90%） RCA (50%) Old myocardial infarction Enlargement of heart size	500	1.6/0.4	13	8	8	6
96	51	M	1	31.51	Physical activity	No reported complaints	Coronary atherosclerosis: LAD (90%) LCX（80%） RCA (30%) Myocardial old cicatricial scar	600	2/0.4	12	8	9	7
97	41	F	1	27.85	Physical activity	No reported complaints	Coronary atherosclerosis: LM (70%) LAD（90%） Pulmonary congestion	480	1.2/0.3	12.5	8	10	9.1
98	61	M	2	24.36	Sleep	No reported complaints	Coronary atherosclerosis: LAD(60%) RCA（95%） Myocardial old cicatricial scar in left ventricle Segmental atherosclerosis of cerebral basilar artery	384	1.2/0.3	12.5	8	11	7.5
99	54	M	1	22.54	After conflict	No reported complaints	Coronary atherosclerosis: LAD (>70%) Pulmonary congestion	302	1.3/0.4	11	8	7.5	7
100	26	M	1	22.07	Physical activity	Chest tightness	Thromboembolism in LAD Myocardial ischemia	305	1.2/0.4	11.5	7.5	9	7
101	42	M	1	24.41	During intravenous drip infusion	Dizzy	Coronary atherosclerosis: LAD (90%)	320	1.1/0.3	10.5	7	8.5	7
102	65	M	1	26.32	After surgery（Spinal canal decompression）	ST elevation Blood pressure drop	Coronary atherosclerosis: LAD (95%) RCA (70%)	400	1.5/0.3	13	8.5	11	10
103	34	M	1	21.36	Remain in hospital for treat	Chest pain	Coronary atherosclerosis: LAD (50%) RCA (75%)	266	0.8/0.2	11.5	6	9	5.5
104	67	M	1	24.9	Remain in hospital for treat	Dyspnea	Coronary atherosclerosis: LAD (50%) RCA (50%) Viral myocarditis	376	1.2/0.3	11	6.5	8	6
105	70	M	1	21.97	Remain in hospital under observation	No reported complaints	Coronary atherosclerosis: LAD (75%) RCA (60%) Pulmonary congestion	300	1.1/0.2	10.5	6.5	8.5	6
106	31	M	1	26.69	Remain in hospital for treat	Heatstroke	Coronary atherosclerosis: LAD (90%)	500	1.5/0.4	11	8.5	8	6.5
107	48	M	2	28.06	Physical activity	Dizzy	Coronary atherosclerosis: LAD (75%) RCA (90%) Pulmonary congestion	559	1.3/0.2	12	8	11	7.5
108	34	M	2	24.2	Remain in hospital for treat	Chest tightness	Coronary atherosclerosis and Thromboembolism in RCA	320	1.1/0.3	11.5	7.5	10	8
109	70	F	1	24.47	Remain in hospital under observation	No reported complaints	Coronary atherosclerosis: LCA (85%) RCA (85%)	300	1.0/0.3	10.5	6.5	9	6
110	57	M	1	23.25	During intravenous drip infusion	No reported complaints	Coronary atherosclerosis: LAD (80%)	330	1.0/0.3	11.5	7.8	9.5	6.5
111	30	M	1	22.54	Remain in hospital for treat	No reported complaints	Coronary atherosclerosis: LAD (80%) RCA (50%)	320	1.1/0.3	11.8	7.5	9	7.5
112	50	M	2	23.73	Remain in hospital for treat	Abdominal pain	Coronary atherosclerosis: LAD (95%) RCA (50%)	350	1.4/0.3	12.5	9	10.5	8.5
113	45	M	1	23.75	Physical activity	Headache	Coronary atherosclerosis: RCA (40%) Thromboembolism in LAD	330	1.3/0.2	11.5	8.2	9.5	8.5
114	50	M	1	24.68	Physical activity	No reported complaints	Coronary atherosclerosis: LAD (90%) LC (90%) RCA (85%) Old myocardial infarction	400	1.5/0.5	13.5	9.5	11	9
115	61	M	1	25.87	Physical activity	No reported complaints	Coronary atherosclerosis: LAD (90%) RCA (20%)	400	1.4/0.3	11.5	8.5	10	8
116	87	M	2	22.56	Found deceased at home	No reported complaints	Coronary atherosclerosis: LAD (70%) Emphysema	320	1.0/0.3	10.5	7	9.5	6.5
117	26	M	1	22.7	During intravenous drip infusion	No reported complaints	Coronary atherosclerosis: LAD (80%) Myocardial hypertrophy	350	1.4/0.2	12.5	8	10	7
118	48	M	1	26.64	Remain in hospital for treat	Chest tightness	Coronary atherosclerosis: LAD (90%) RCA (50%) Thromboembolism in LAD	400	1.1/0.2	13.2	7	10	5.5
119	75	M	1	29.42	Remain in hospital for treat	Abdominal pain Vomit	Coronary atherosclerosis: LAD (90%) RCA (90%)	550	1.5/0.3	12.5	7.5	10	7
120	48	M	1	26.3	Physical activity	No reported complaints	Coronary atherosclerosis: LAD (90%) LCX (70%)RCA (60%) Thromboembolism in LAD Old myocardial infarction	495	1.3/0.3	13	8.5	11	7.5
121	48	M	1	23.13	Physical activity	No reported complaints	Coronary atherosclerosis: LAD (>75%) Pneumonia and Pulmonary abscess	370	0.9/0.3	11.7	7.4	8.5	7.5
122	92	F	2	20.74	During intravenous drip infusion	Chest tightness	Coronary atherosclerosis: LAD (80%) LCX (60%)RCA (80%) Old myocardial infarction	280	0.8/0.3	10.5	7	9	6.5
123	77	M	1	25.43	After conflict	No reported complaints	Coronary atherosclerosis: LAD (>90%)RCA (40%)	408	1.3/0.3	11	7.5	8	6
124	51	M	1	29.54	After conflict	No reported complaints	Coronary atherosclerosis: LAD (90%) LCX (50%)RCA (90%) Left ventricular fibrous scar	450	1.2/0.3	14.5	9	10.8	8
125	31	M	1	23.61	Drinking alcohol	Abdominal pain Vomit	Coronary atherosclerosis: LAD (90%) Thromboembolism in LAD	330	1.1/0.4	11	8	9.5	6.4
126	71	M	1	25.38	Remain in hospital for treat	No reported complaints	Coronary atherosclerosis: LAD (90%)RCA (95%) Old myocardial infarction Old cerebral infarction of the left cerebral basilar nucleus	410	1.4/0.3	11.5	7.5	9	6.5
127	62	M	1	27.27	Remain in hospital for treat	Abdominal pain	Coronary atherosclerosis: LAD (90%)RCA (95%)	400	1.4/0.3	12	8	9.5	7
128	58	M	1	27.78	After intravenous drip infusion	Dyspnea	Coronary atherosclerosis: LAD (>80%)LCX (40%) Myocardial infarction in left ventricle and ventricular septum	380	2/0.4	11.5	8.5	10	7.2
129	28	M	1	19.6	After surgery(Incision and drainage of posterior head abscess)	Chest tightness	Coronary atherosclerosis: RCA (90%) Thromboembolism in LCA and RCA	230	0.8/0.2	9	6.5	7.5	6
130	61	M	1	26.29	Remain in hospital for treat	No reported complaints	Coronary atherosclerosis: LAD (95%)RCA (50%) Pulmonary congestion	445	2/0.4	13	8	10	7
131	46	M	3	22.14	Remain in hospital for treat	Common cold	Coronary atherosclerosis: LAD (75%) RCA (70%) Thromboembolism in RCA	330	1.2/0.3	10.5	7.5	9	7
132	61	M	2	22.58	Drinking alcohol	No reported complaints	Coronary atherosclerosis: LAD (90%) RCA (50%)	320	1.1/0.4	10.5	8	9.5	6.5
133	27	M	1	22.26	Found deceased at home	Abdominal distension	Coronary atherosclerosis: LAD (70%) Fat infiltration in right ventricular	300	1.0/0.3	9.5	6	9	5.5
134	65	M	2	28.07	After conflict	No reported complaints	Coronary atherosclerosis: LAD (90%) LCX (>90%) Old myocardial infarction	527	1/0.3	11.5	7.5	9	7
135	47	M	1	26.7	After conflict	No reported complaints	Coronary atherosclerosis: LAD (95%) RCA (20%) Hemorrhage in atheromatous plaque	440	1.5/0.4	13	8.5	10.5	9
136	66	M	1	27.79	After surgery	Loss of consciousness	Coronary atherosclerosis: LCX (90%) RCA (50%) Thromboembolism in LCX	500	1.5/0.3	10.5	7.8	8.5	8
137	54	M	1	22.61	Remain in hospital for treat	Nervous	Coronary atherosclerosis: LAD (70%) RCA (80%) Hemorrhage in atheromatous plaque	350	1.4/0.4	11	8.5	9	8
138	44	M	2	22.4	Remain in hospital for treat	Abdominal pain	Coronary atherosclerosis: LAD (90%) RCA (20%)	320	1.3/0.4	10.5	8	9.5	7.2
139	63	F	1	24.87	Found deceased at home	No reported complaints	Coronary atherosclerosis: LAD (90%)	350	1.6/0.4	13	9.5	10	9
140	31	M	1	23.98	Drinking alcohol	No reported complaints	Coronary atherosclerosis: LAD (85%)	310	1.3/0.4	11.5	9	10	8.5
141	44	F	2	21.54	After intravenous drip infusion	Common cold	Coronary atherosclerosis: LAD (80%)	290	1.2/0.3	10	7	9.5	6.5
142	37	M	1	19.11	Remain in hospital for treat	Loss of consciousness	Coronary atherosclerosis: LAD (80%)Thromboembolism in LAD Hemorrhage in atheromatous plaque	260	1.1/0.2	10	7.5	9.5	6
143	66	M	1	24.32	Found deceased at home	No reported complaints	Coronary atherosclerosis: LAD (80%) RCA (40%)	360	2.0/0.5	13.5	10.5	11.5	8
144	59	M	1	29.37	Found deceased at rest room	No reported complaints	Coronary atherosclerosis: LAD (90%) LCX (80%) RCA (30%) Old myocardial infarction	500	1.5/0.5	11.5	8	10	7.8
145	52	M	1	21.32	After conflict	No reported complaints	Coronary atherosclerosis: LAD (70%) LCX (>70%) RCA (50%)	320	1.5/0.4	12.5	8	9.5	7.5
146	70	M	2	20.92	Remain in hospital for treat	No reported complaints	Coronary atherosclerosis: LAD (95%) LCX (90%) RCA (70%)	300	1.5/0.4	12	8	10	7
147	42	M	1	23.28	Faint at home	Vomit Headache	Coronary atherosclerosis: LAD (85%)	335	1.4/0.3	11.5	7.5	9.5	7.5
148	42	M	2	21.1	Remain in hospital for treat	Vomit	Coronary atherosclerosis: LAD (75%)	320	1.3/0.3	11	6.5	9	8
149	76	F	1	27.39	After intravenous drip infusion	Trauma	Coronary atherosclerosis: LAD (95%) Myocardial hypertrophy	405	1.5/0.3	12.5	8	9.5	8
150	47	M	1	26.12	Faint at hospital	Numbness of right limbs	Coronary atherosclerosis: LAD (40%)	400	1.4/0.4	11.5	8	9	7
151	50	M	1	21.18	Found deceased at home	No reported complaints	Coronary atherosclerosis: LAD (80%) RCA (40%)	310	1.5/0.4	11.5	7	9	7.5
152	52	F	2	27.11	Found deceased at home	Abdominal distension	Coronary atherosclerosis: LAD (80%) RCA (40-50%)	404	1.2/0.2	10	7.5	8	5.5
153	62	M	1	24.31	Remain in hospital for treat	Abdominal distension Coronary	Coronary atherosclerosis: LAD (85%) RCA (70%)	305	1.0/0.3	10	7	9	7.5
154	47	M	1	27.7	After surgery	slow flow	Coronary atherosclerosis: LAD (>80%) LCX (80%)Thromboembolism in LAD	510	1.5/0.3	12.5	7..5	10	7.5
155	47	M	1	23.81	Remain in hospital for treat	Cough	Coronary atherosclerosis: LAD (75%)	300	0.9/0.2	9.5	6.5	8.5	5.5
156	49	M	1	25.54	Found deceased at hotel	Abdominal distension	Coronary atherosclerosis: LAD (70%) RCA (30%)	390	1.6/0.3	13.2	10.5	11.5	10
157	56	M	2	20.34	Found deceased at home	Nausea Vomit	Coronary atherosclerosis: LAD (75%) LCX (60%) RCA (60%)	300	1.1/0.4	10	7	9.5	6.5
158	47	M	1	26.31	Remain in hospital for treat	Loss of consciousness	Coronary atherosclerosis: LM (>75%) LAD (50%)	380	1.8/0.5	12	7.5	10	7
159	60	M	2	23.28	Remain in hospital for treat	Cough	Coronary atherosclerosis: LAD (70%) RCA (60%)	300	1.0/0.3	11.5	8	9.5	7.5
160	41	M	1	22.08	Remain in hospital for treat	Chest distress	Coronary atherosclerosis: LAD (70%) RCA (60%)	290	1.0/0.2	10	6.5	11	8
161	52	M	2	25.89	After conflict	Polypnea	Coronary atherosclerosis: LAD (90%) LCX (30%) RCA (40%)Myocardial hypertrophy	400	1.4/0.4	12.5	10.5	11	8
162	55	M	2	22.13	After conflict	No reported complaints	Coronary atherosclerosis: LAD (80%)	300	1.2/0.3	10	7.5	9	8
163	50	M	2	26.52	Remain in hospital for treat	Faint at hospital	Coronary atherosclerosis: LAD (>80%) RCA (75%) Old myocardial infarction	462	1.3/0.3	13.5	10	11	9
164	33	M	2	22.6	Remain in hospital for treat	Cough	Coronary atherosclerosis: RCA (>75%)	290	1.2/0.4	9.5	6.5	8.5	5.5
165	45	M	2	24.02	Found deceased at home	Chest distress	Coronary atherosclerosis: LAD (30%) RCA (75%)Hemorrhage in atheromatous plaque	310	1.3/0.4	11.5	8.5	10	8
166	62	M	2	26.41	Remain in hospital for treat	No reported complaints	Coronary atherosclerosis: LAD (75%)	450	1.4/0.3	12	6	10	6
